# Supplementary material
Source: MDPI journal article supplement (https://www.mdpi.com/2073-4344/12/7/770)
Supplement: s1 [file s1]

## Supporting Information

# Block Copolymer and Cellulose Templated Mesoporous TiO<sub>2</sub>-SiO<sub>2</sub> Nanocomposite as Superior Photocatalyst

Sudipto Pal <sup>1,\*</sup>, Antonietta Taurino <sup>2</sup>, Massimo Catalano <sup>2</sup> and Antonio Licciulli <sup>1,3</sup>

<sup>1</sup> Department of Engineering for Innovation, University of Salento, Via per Monteroni, 73100 Lecce, Italy; antonio.licciulli@unisalento.it

<sup>2</sup> Institute for Microelectronics and Microsystems (IMM), CNR, Via Monteroni, 73100 Lecce, Italy; antonietta.taurino@le.imm.cnr.it (A.T.); massimo.catalano@le.imm.cnr.it (M.C.)

<sup>3</sup> Institute of Nanotechnology, CNR Nanotec, Consiglio Nazionale Delle Ricerche, Via Monteroni, 73100 Lecce, Italy

\* Correspondence: sudipto.pal@unisalento.it

**Table S1.** Physicochemical properties of the TiO<sub>2</sub>/SiO<sub>2</sub> composites.

| Sample | Composition (wt%)                        | Surface area (S <sub>BET</sub> , m <sup>2</sup> g <sup>-1</sup> ) | Pore diameter (nm) | Pore volume (cm <sup>3</sup> g <sup>-1</sup> ) |
|--------|------------------------------------------|-------------------------------------------------------------------|--------------------|------------------------------------------------|
| TS01   | SiO <sub>2</sub>                         | 553.31                                                            | 3.42               | 0.65                                           |
| TS73   | TiO <sub>2</sub> /SiO <sub>2</sub> 70/30 | 196.52                                                            | 3.71               | 0.44                                           |
| TS82   | TiO <sub>2</sub> /SiO <sub>2</sub> 80/20 | 165.93                                                            | 3.79               | 0.38                                           |
| TS91   | TiO <sub>2</sub> /SiO <sub>2</sub> 90/10 | 110.49                                                            | 16.46              | 0.47                                           |
| TS10   | TiO <sub>2</sub>                         | 53.97                                                             | 16.72              | 0.31                                           |

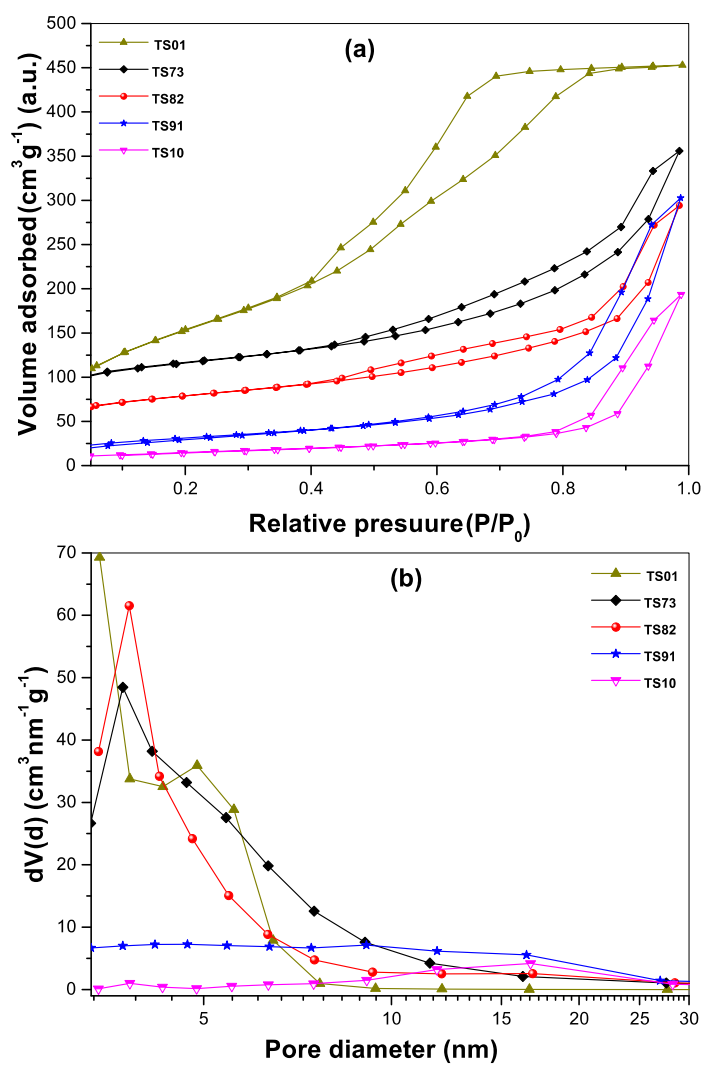

**Figure S1.** (a)  $\text{N}_2$  adsorption-desorption isotherms and (b) pore size distribution plots of composite powders with different  $\text{TiO}_2/\text{SiO}_2$  weight ratios.

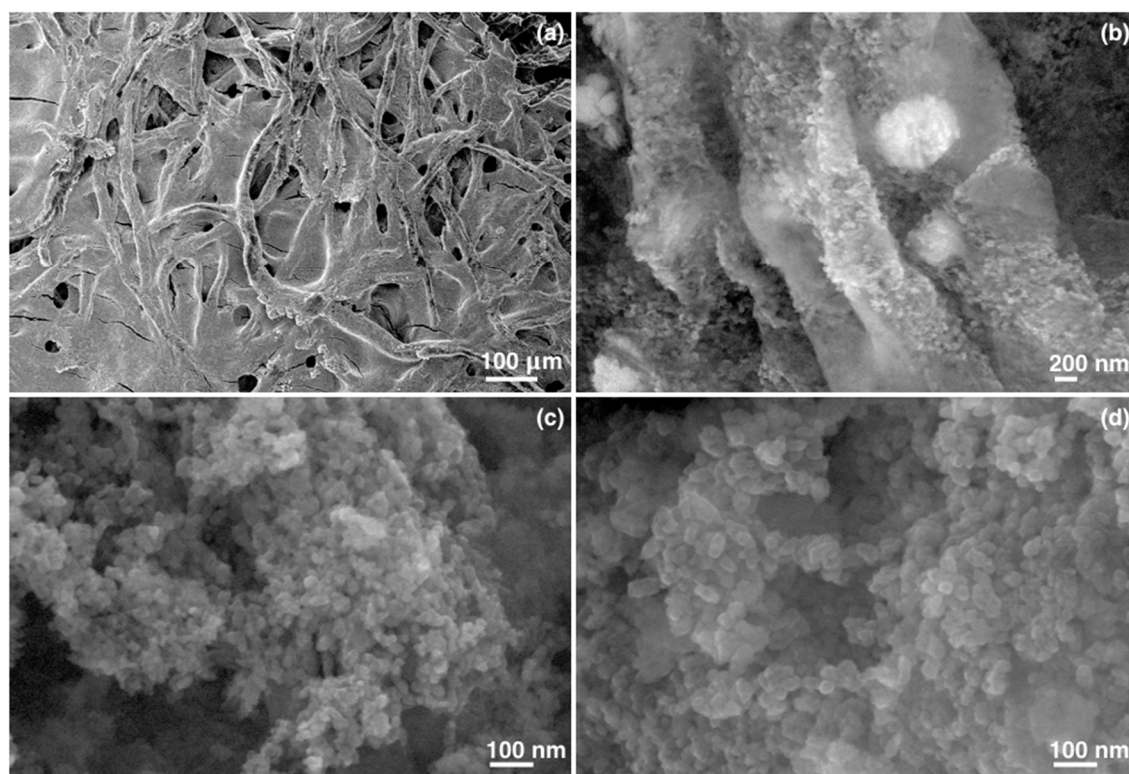

**Figure S2.** FESEM images of TS82C, (a, b) As prepared composite after drying, (c, d) after calcination at 550  $^{\circ}\text{C}$ .

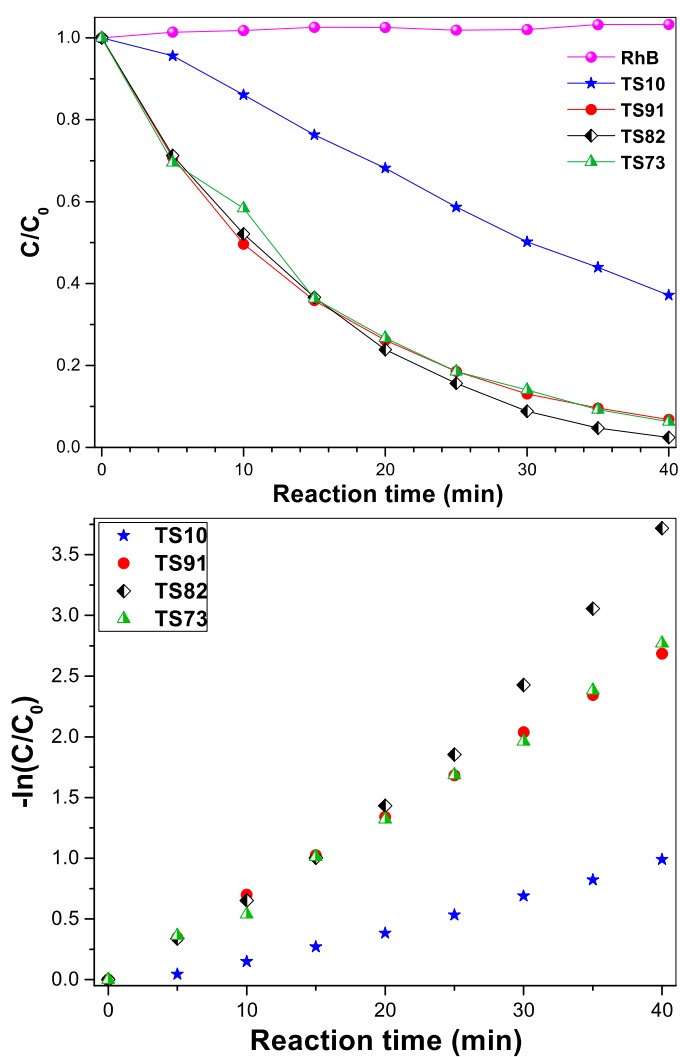

**Figure S3.** Photocatalytic degradation of RhB dye ( $15 \times 10^{-6}$  M) with different  $\text{TiO}_2/\text{SiO}_2$  photocatalysts.

**Table S2.** Parameters of RhB dye degradation kinetics with different  $\text{TiO}_2/\text{SiO}_2$  composites.

| Sample | Rate constant<br>( $K, \text{min}^{-1}$ ) | Adj. $R^2$ |
|--------|-------------------------------------------|------------|
| TS10   | 0.025                                     | 0.97       |
| TS91   | 0.067                                     | 0.99       |
| TS82   | 0.092                                     | 0.98       |
| TS73   | 0.068                                     | 0.99       |

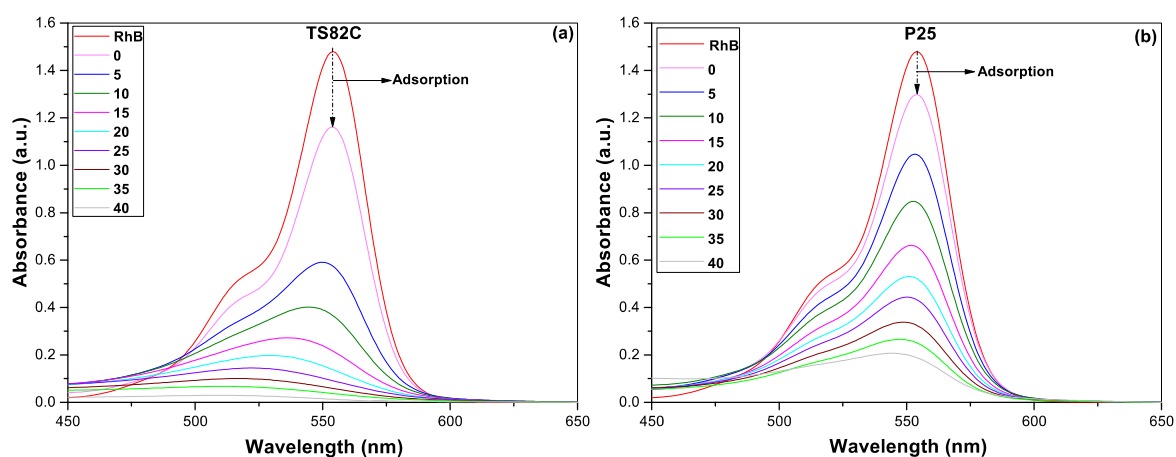

**Figure S4.** Optical absorption spectra of RhB dye ( $15 \times 10^{-6}$  M) with solar light exposure time performed with (a) TS82C and (b) P25 photocatalysts. The adsorption-desorption equilibrium was determined after stirring of 18 h at the dark.

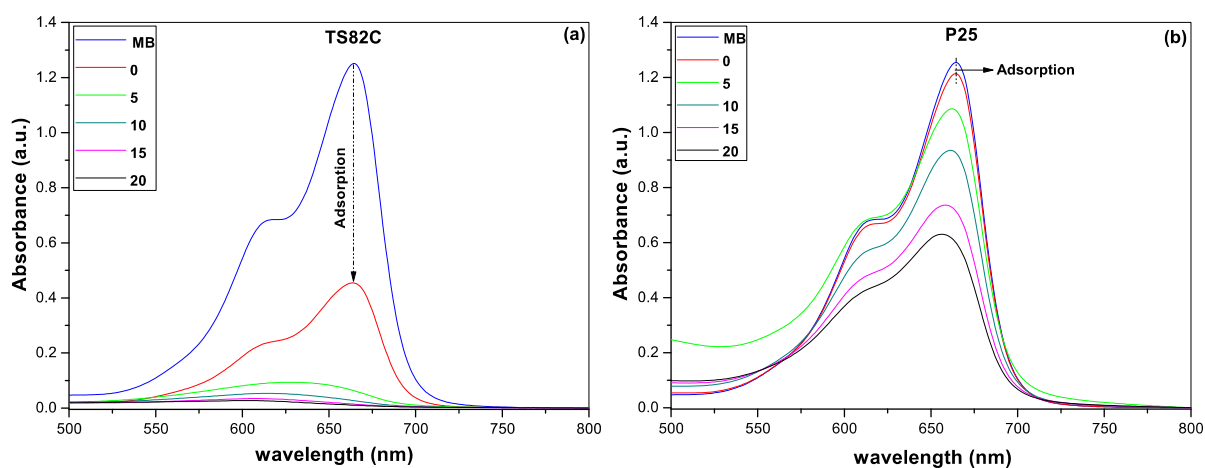

**Figure S5.** Optical absorption spectra of MB dye ( $15 \times 10^{-6}$  M) with solar light exposure time performed with (a) TS82C and (b) P25 photocatalysts. The adsorption-desorption equilibrium was determined after stirring of 18 h in dark.

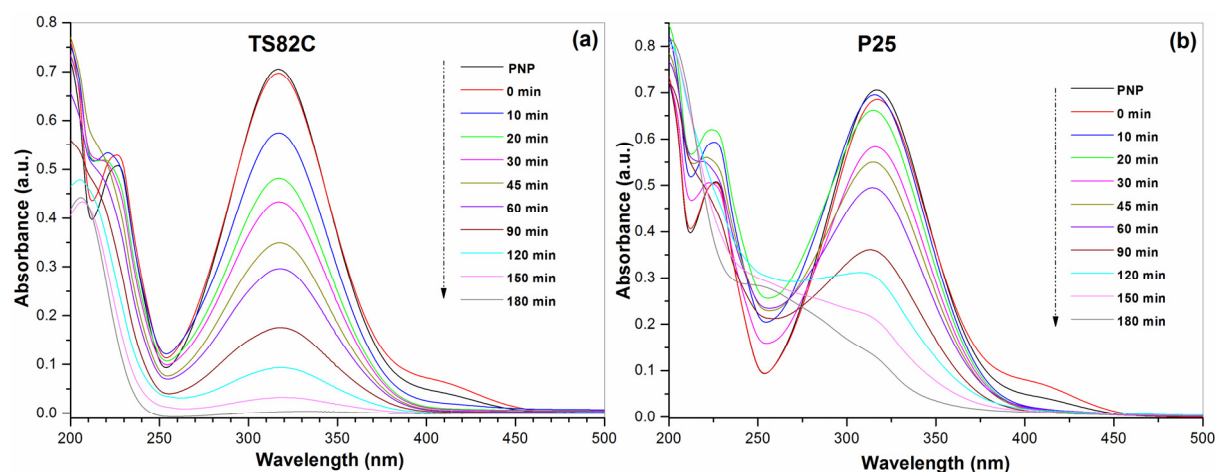

**Figure S6.** Optical absorption spectra of 4NP compound ( $15 \times 10^{-6}$  M) with solar light exposure time performed with (a) TS82C and (b) P25 photocatalysts. The adsorption-desorption equilibrium was determined after stirring of 18 h in dark.

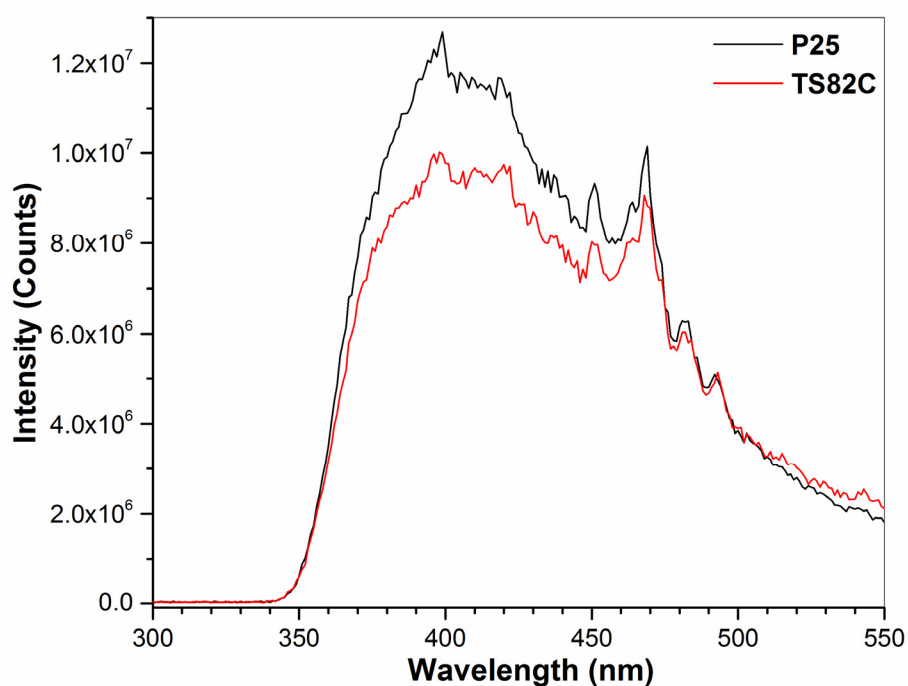

**Figure S7.** Photoluminescence (PL) spectra of TS82C nanocomposite (Red line) and P25 TiO<sub>2</sub> (Black line) measured on Horiba JOBIN YVON Fluoromax-P PL spectrophotometer using 365 nm as the excitation wavelength.

**Table S3.** Comparative study of the photocatalytic activity with different TiO<sub>2</sub>/SiO<sub>2</sub> photocatalysts.

| Catalyst                                                  | Catalyst dose | Pollutant      | Pollutant dose/volume              | Light source                                             | Photocatalytic efficiency                                |
|-----------------------------------------------------------|---------------|----------------|------------------------------------|----------------------------------------------------------|----------------------------------------------------------|
| TiO <sub>2</sub> -SiO <sub>2</sub> aerogel[1]             | 0.6g/L        | Methylene Blue | 48 mg/L, 200 mL                    | 100W Mercury lamp                                        | K=0.0681 min <sup>-1</sup> /70 min (96%)                 |
| TiO <sub>2</sub> @SiO <sub>2</sub> NPs[2]                 | 0.5–1.0 g/L   | Methylene Blue | 10 mg/L                            | Sunlight/8W UV lamp                                      | 120 min (98%)/240 min (95%)                              |
| 3D hollow SiO <sub>2</sub> @TiO <sub>2</sub> spheres[3]   | 0.3 g/L       | Rhodamine B    | 20 mg/L, 50 mL                     | 300W Hg lamp                                             | K=0.0465 min <sup>-1</sup> /105 min <sup>-1</sup> 82.24% |
| SiO <sub>2</sub> @TiO <sub>2</sub> core@shell NPs[4]      | 0.428 g/L     | Crystal Violet | 20 mg/L, 35 mL                     | Xe arc lamp (18.5 mW/cm <sup>2</sup> @365 nm)            | 50 min (≥90%)                                            |
| TiO <sub>2</sub> -SiO <sub>2</sub> hollow nanospheres[5]  | 2.5 g/L       | Methylene Blue | 50 mg/L, 20 mL                     | Hg UV lamp@365 nm                                        | 140 min (~ 90%)                                          |
| TiO <sub>2</sub> -SiO <sub>2</sub> nanocomposite[6]       | 1 g/L         | Methylene Blue | 10 mg/L, 500 mL                    | 9W/78 UVA lamp (1.5 W; 315–400 nm)                       | K=0.056 min <sup>-1</sup> 120 min (~ 95%)                |
| TiO <sub>2</sub> /SiO <sub>2</sub> powder[7]              | 0.5 g         | 4-Nitrophenol  | 20 mg/L                            | 125 W Hg lamp, 10.8 mW/cm <sup>2</sup>                   | 240 min (~ 100%)                                         |
| Hollow TiO <sub>2</sub> -SiO <sub>2</sub> microspheres[8] | 1 g/L         | Methyl Orange  | 10 mg/L                            | 300 W Xe arc lamp                                        | 100 min (~ 100%)                                         |
| This work                                                 | 1 g/L         | Methylene Blue | 15 x 10 <sup>-6</sup> M (~ 5 mg/L) | 300 W Tungsten lamp (41.4 W/m <sup>2</sup> , 380–780 nm) | K=0.188 min <sup>-1</sup> 20 min (~ 100%)                |

## References

- Kim, Y.N.; Shao, G.N.; Jeon, S.J.; Imran, S.M.; Sarawade, P.B.; Kim, H.T. Sol–Gel Synthesis of Sodium Silicate and Titanium Oxychloride Based TiO<sub>2</sub>–SiO<sub>2</sub> Aerogels and Their Photocatalytic Property under UV Irradiation. *Chemical Engineering Journal* **2013**, *231*, 502–511, doi:10.1016/j.cej.2013.07.072.
- Mahanta, U.; Khandelwal, M.; Deshpande, A.S. TiO<sub>2</sub>@SiO<sub>2</sub> Nanoparticles for Methylene Blue Removal and Photocatalytic Degradation under Natural Sunlight and Low-Power UV Light. *Applied Surface Science* **2022**, *576*, 151745, doi:10.1016/j.apsusc.2021.151745.

3. Bao, Y.; Guo, R.; Gao, M.; Kang, Q.; Ma, J. Morphology Control of 3D Hierarchical Urchin-like Hollow SiO<sub>2</sub>@TiO<sub>2</sub> Spheres for Photocatalytic Degradation: Influence of Calcination Temperature. *Journal of Alloys and Compounds* **2021**, *853*, 157202, doi:10.1016/j.jallcom.2020.157202.
4. Ferreira-Neto, E.P.; Ullah, S.; Simões, M.B.; Perissinotto, A.P.; de Vicente, F.S.; Noeske, P.-L.M.; Ribeiro, S.J.L.; Rodrigues-Filho, U.P. Solvent-Controlled Deposition of Titania on Silica Spheres for the Preparation of SiO<sub>2</sub>@TiO<sub>2</sub> Core@shell Nanoparticles with Enhanced Photocatalytic Activity. *Colloids and Surfaces A: Physicochemical and Engineering Aspects* **2019**, *570*, 293–305, doi:10.1016/j.colsurfa.2019.03.036.
5. Guo, N.; Liang, Y.; Lan, S.; Liu, L.; Ji, G.; Gan, S.; Zou, H.; Xu, X. Uniform TiO<sub>2</sub>–SiO<sub>2</sub> Hollow Nanospheres: Synthesis, Characterization and Enhanced Adsorption–Photodegradation of Azo Dyes and Phenol. *Applied Surface Science* **2014**, *305*, 562–574, doi:10.1016/j.apsusc.2014.03.136.
6. Palhares, H.G.; Nunes, E.H.M.; Houmard, M. Heat Treatment as a Key Factor for Enhancing the Photodegradation Performance of Hydrothermally-Treated Sol–Gel TiO<sub>2</sub>–SiO<sub>2</sub> Nanocomposites. *J Sol-Gel Sci Technol* **2021**, *99*, 188–197, doi:10.1007/s10971-021-05545-7.
7. Bellardita, M.; Addamo, M.; Di Paola, A.; Marci, G.; Palmisano, L.; Cassar, L.; Borsa, M. Photocatalytic Activity of TiO<sub>2</sub>/SiO<sub>2</sub> Systems. *Journal of Hazardous Materials* **2010**, *174*, 707–713, doi:10.1016/j.jhazmat.2009.09.108.
8. Liao, S.; Lin, L.; Huang, J.; Jing, X.; Chen, S.; Li, Q. Microorganism-Templated Nanoarchitectonics of Hollow TiO<sub>2</sub>-SiO<sub>2</sub> Microspheres with Enhanced Photocatalytic Activity for Degradation of Methyl Orange. *Nanomaterials* **2022**, *12*, 1606, doi:10.3390/nano12091606.
